# Supplementary material
Source: MDPI journal article supplement (https://www.mdpi.com/2037-0164/14/4/81)
Supplement: s1 [file s1]

Archive with 1 entries (1 files):
- ijpb-2685377-supplementary.pdf
